# Supplementary material for: Ideal PN photodiode using doping controlled WSe2–MoSe2 lateral heterostructure
Source: Royal Society of Chemistry journal article supplement (doi:10.1039/d0tc05625a), 2021-01-01
Supplement: d0tc05625a1.pdf [file d0tc05625a1.pdf]

## Supplementary Information

# Ideal PN Photodiode using Doping Controlled WSe<sub>2</sub>- MoSe<sub>2</sub> Lateral Heterostructure

Ji Eun Kim<sup>a</sup>, Won Tae Kang<sup>a,b</sup>, Van Tu Vu<sup>a</sup>, Young Rae Kim<sup>a,b</sup>, Yong Seon Shin<sup>a</sup>, Ilmin Lee<sup>a</sup>, Ui Yeon Won<sup>a</sup>, Boo Heung Lee<sup>a</sup>, Kunnyun Kim<sup>c</sup>, Thanh Luan Phan<sup>a\*</sup>, Young Hee Lee<sup>b,d</sup>, and Woo Jong Yu<sup>a\*</sup>

### 1. Role of NaOH as the promoter

We chose NaOH as a promoter. It has been reported that the promoter plays important role in enhancing the growth because it can create more vapor of growth precursor as well as decrease the melting point.<sup>1</sup> The MoSe<sub>2</sub> can be fast grown at low temperature without the NaOH assistant due to the presence of Na as the promoter, as seen in the previous report.<sup>2</sup> After CVD grown MoSe<sub>2</sub> was finished, then Nb-doped WSe<sub>2</sub> started growing along the edge of as-grown MoSe<sub>2</sub> due to rich defects. However, Nb-doped WSe<sub>2</sub> has only formed particles due to low chemical activity and a high melting point of WO<sub>3</sub> without the assistance of NaOH promoter, as demonstrated in Figure S1. The existence of Na from AMT is insufficient for the enhanced growth of Nb-doped WSe<sub>2</sub>. The W and Nb oxide species will react with NaOH to create the active Na<sub>2</sub>W<sub>x</sub>Nb<sub>1-x</sub>O<sub>4</sub> compound. The possible reaction route of MoSe<sub>2</sub> and Nb-doped WSe<sub>2</sub> during growth are as follow.

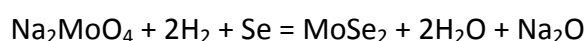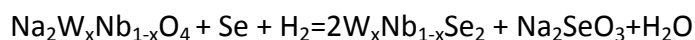

Beside NaOH, other alkali metal promoter such as NaCl, KCl, KOH etc can be used as effective promoters as demonstrated in the previous report.<sup>3</sup>

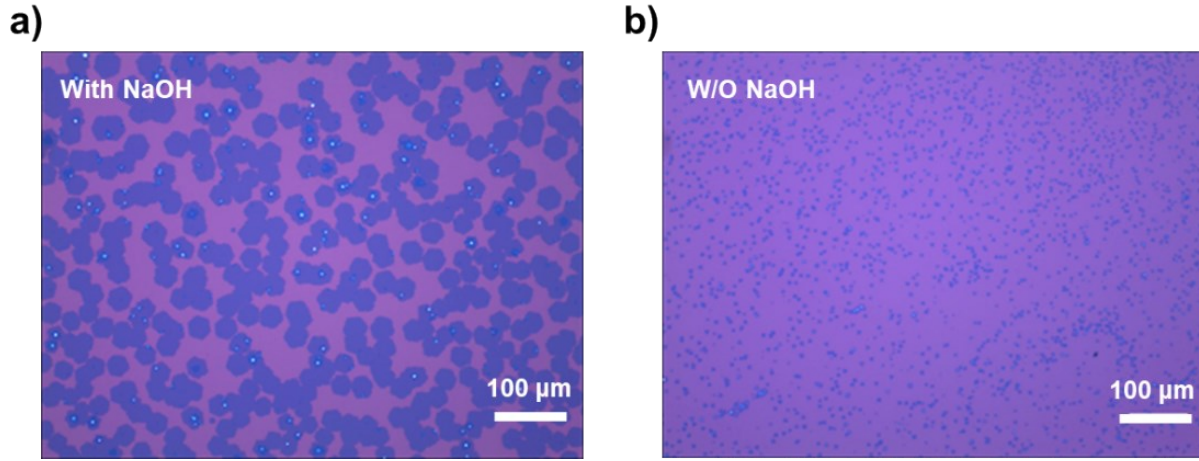

**Figure S1.** Effect of NaOH promoter on Nb-doped WSe<sub>2</sub> via CVD growth.

## 2. Ideality factor of the PN diode

The ideality factor of the PN diode can be extracted from the slope of the  $\ln I-V$  equation of

$$J = J_0(e^{\frac{qV}{nKT}} - 1) \quad (1)$$

where  $n$  is the diode quality factor, which ranges from 1 to 2,  $q$  is the electric charge  $1.6E^{-19}$  (C),  $k_B$  is the Boltzmann constant  $1.37E^{-23}$  (J/K), and  $T$  is the absolute temperature of 273.14 K. In the  $\ln(J) - V$  relational expression ( $\ln(J) = \ln(J_0) + \frac{q}{nKT} \times V_a$ ), the  $n$  term can be obtained by assigning the constant values of  $q$ ,  $k_B$ , and  $T$  to the slope. Thus, with the measured data,  $n$  is calculated to be 1.3, which is close to the ideality factor of 1 (inset graph of Figure 3h).

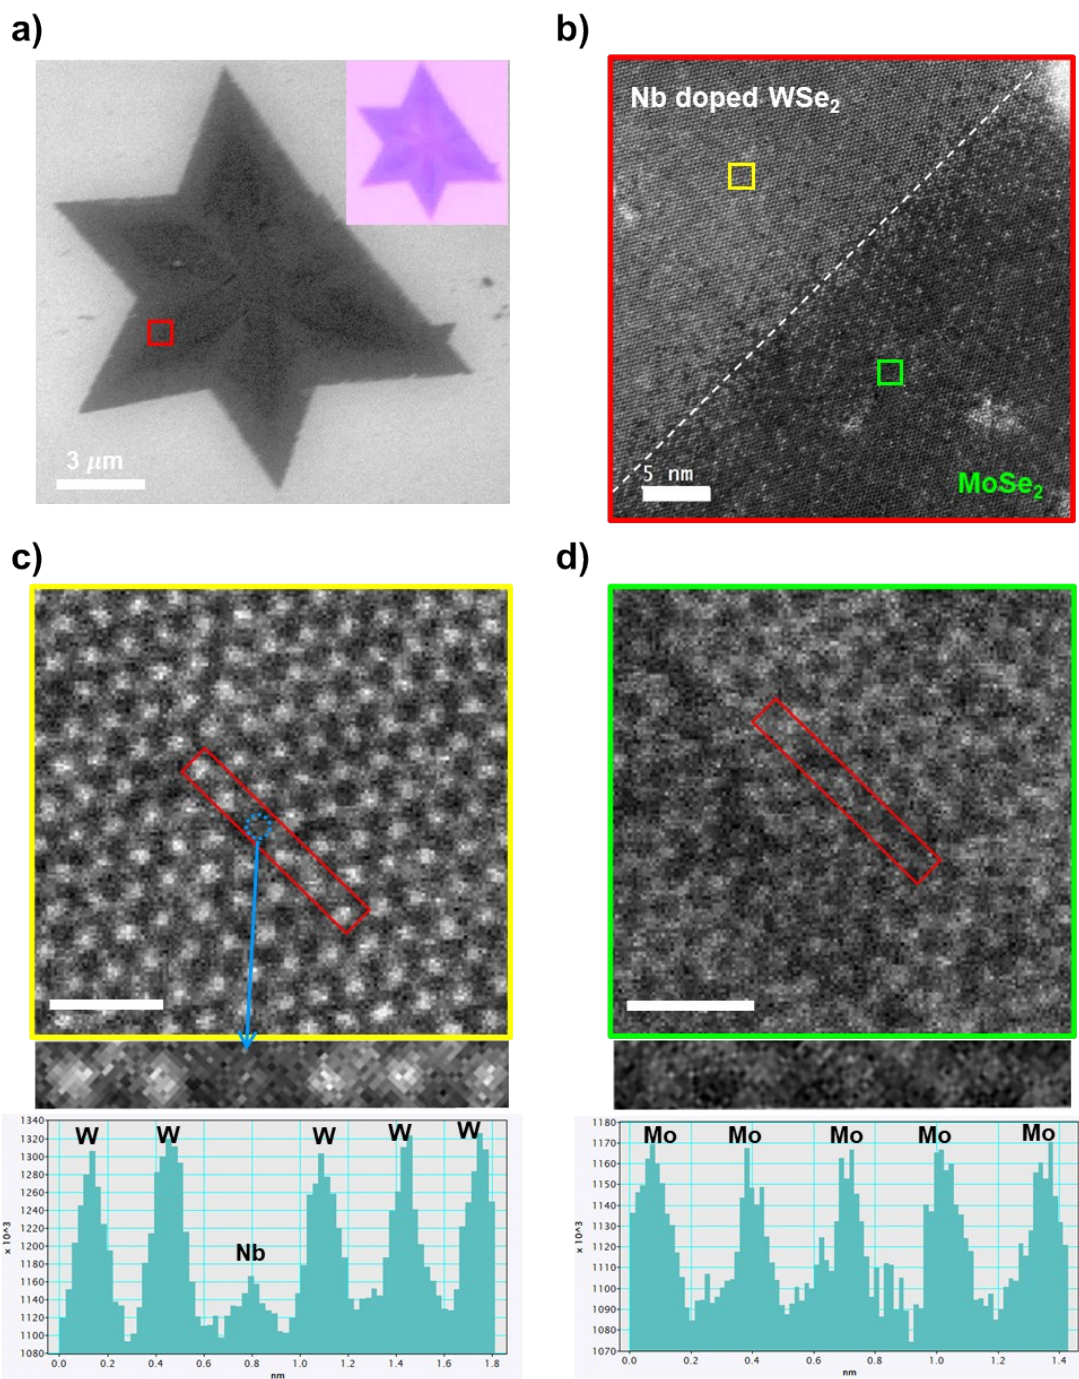

**Figure S2.** FESEM (a) and STEM (b-d) image of the CVD-grown Nb-doped WSe<sub>2</sub>-MoSe<sub>2</sub> lateral heterostructure. The scale bars of c) and d) indicate 0.7 nm.

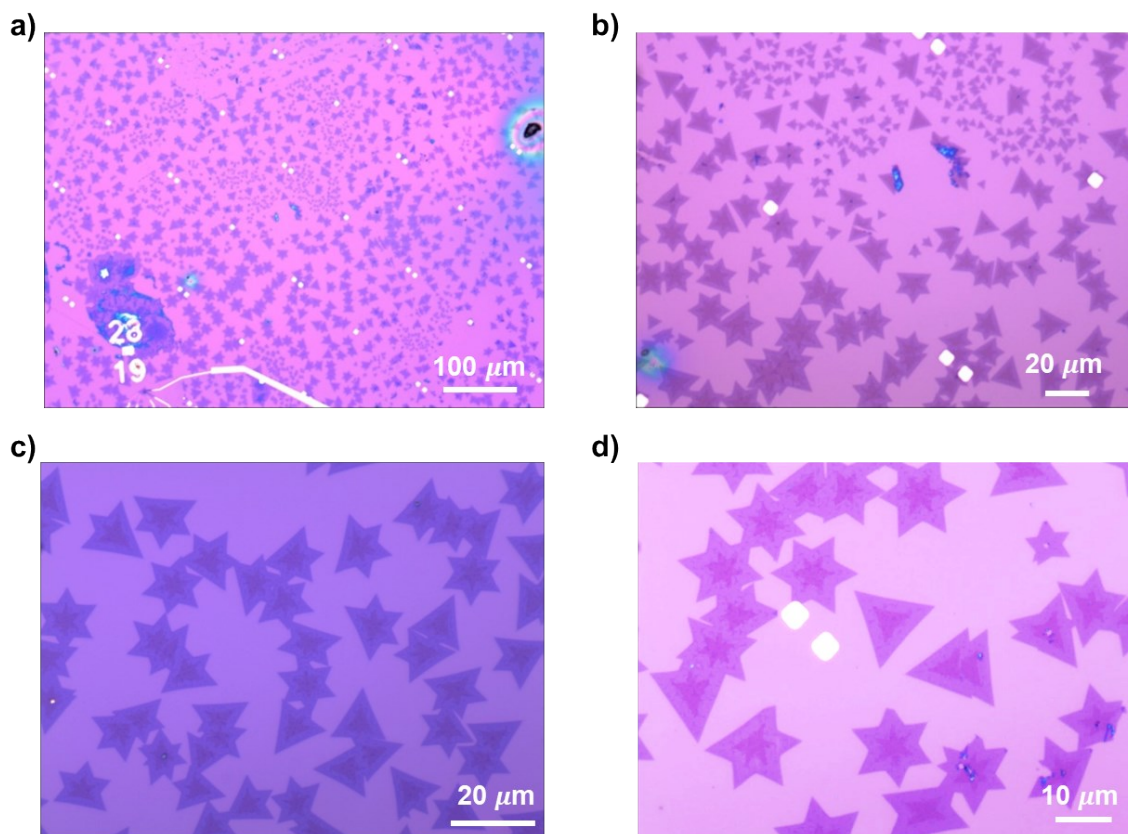

**Figure S3.** High yield of the CVD-grown Nb-doped  $\text{WSe}_2$ - $\text{MoSe}_2$  lateral heterostructure.

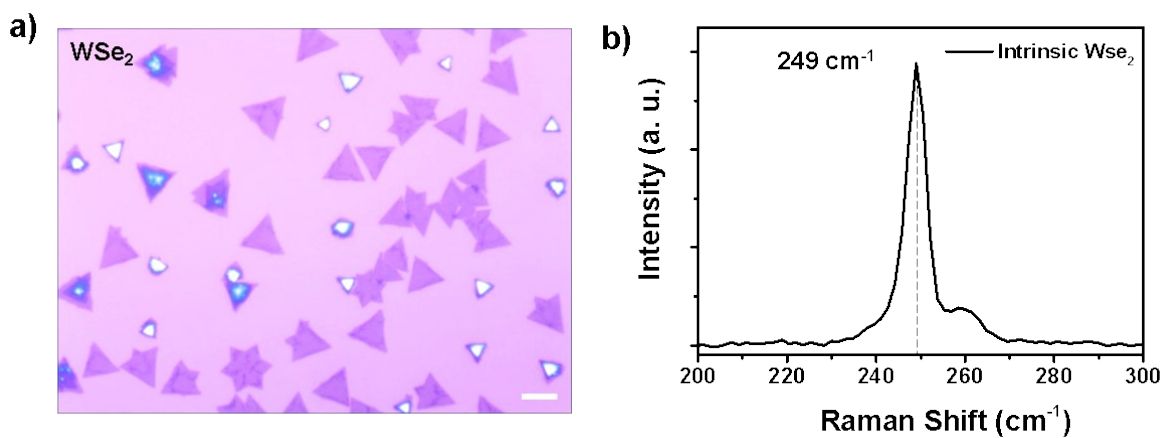

**Fig**

**ure S4.** a) Optical microscopic image of the CVD-grown intrinsic  $\text{WSe}_2$ . The scale bar is  $10 \mu\text{m}$  b) Raman spectrum of the  $\text{WSe}_2$ . The main peak is  $249 \text{ cm}^{-1}$ .

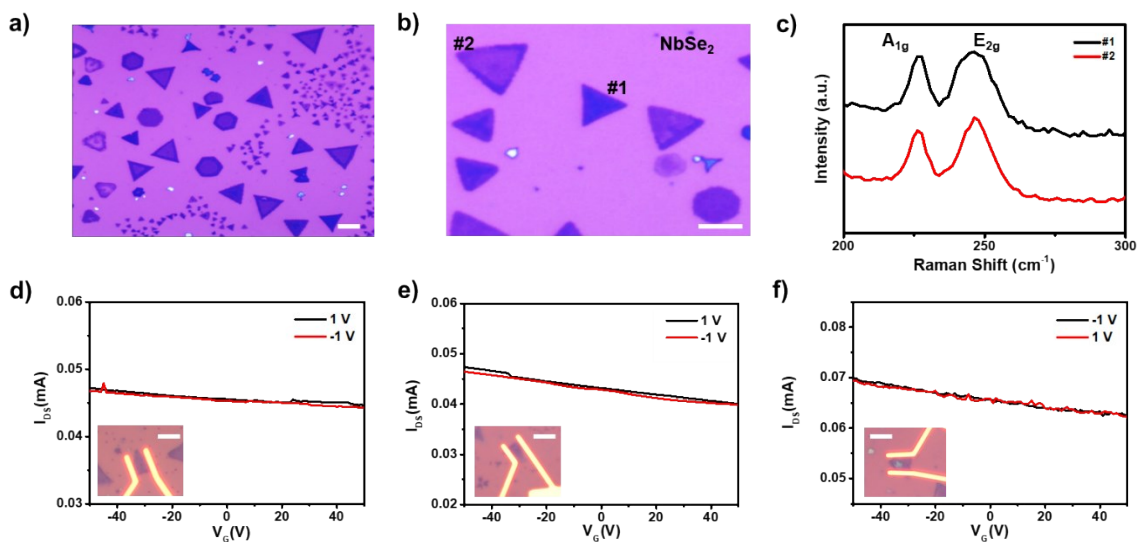

**Figure S5.** a) Optical microscopic image of the CVD-grown NbSe<sub>2</sub>. All scale bars are 10 μm. b) Expanded image. c) Raman spectra from sample #1, #2 of b. d–f) Metallic properties of the CVD-grown NbSe<sub>2</sub>.

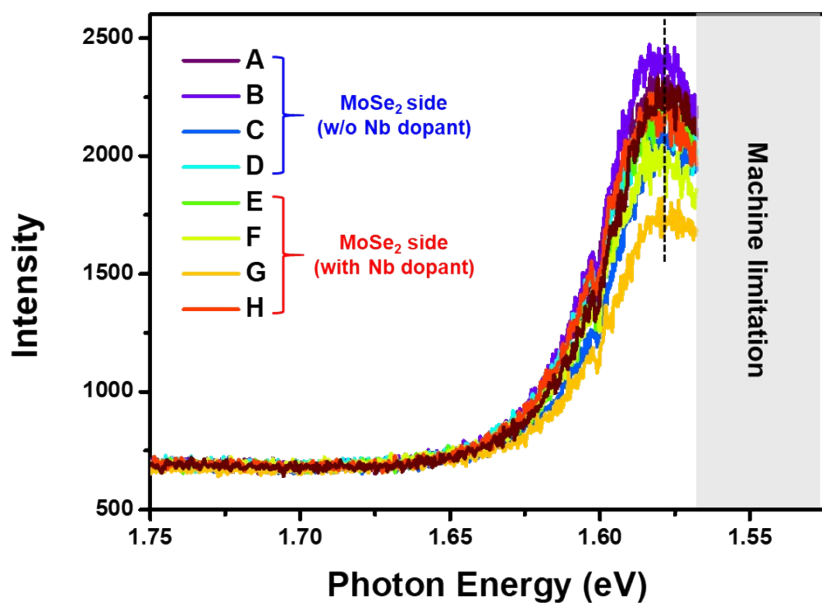

**Figure S6.** PL spectrum of MoSe<sub>2</sub> domain in WSe<sub>2</sub>-MoSe<sub>2</sub> heterostructure with and without Nb-dopant

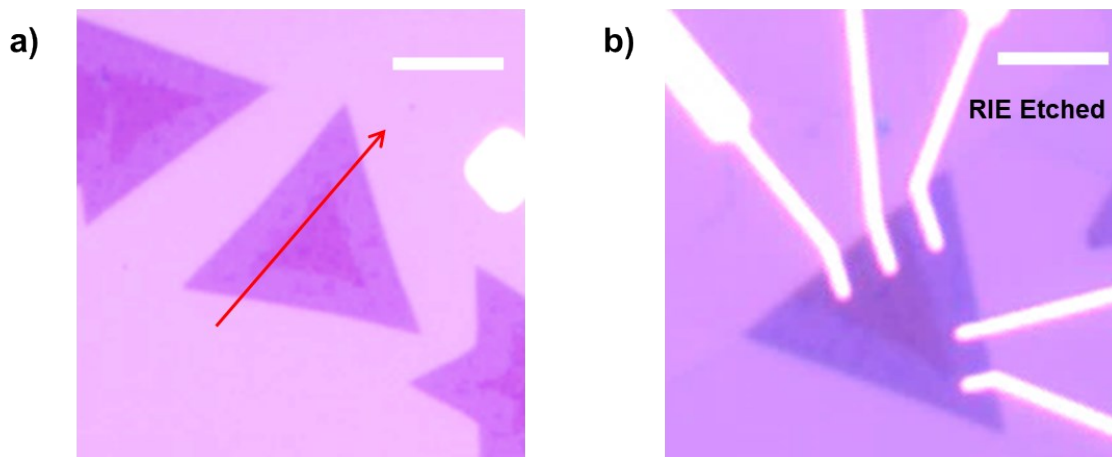

**Figure S7.** a) Optical microscopic image of the CVD-grown lateral heterostructure. b) Etched flakes by RIE using  $\text{SF}_6$ . All scale bars are  $5 \mu\text{m}$ .

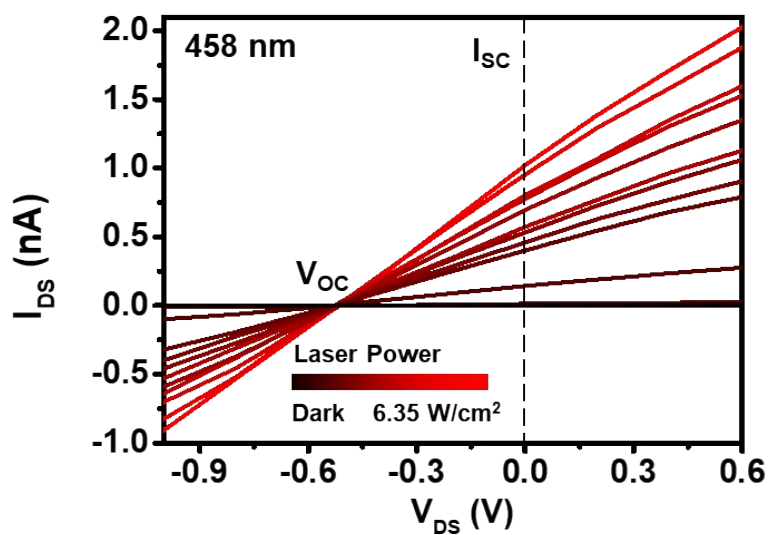

**Figure S8.** Short-circuit current and open-circuit voltage under 458 nm laser. The open-circuit voltage is about 0.52 V.

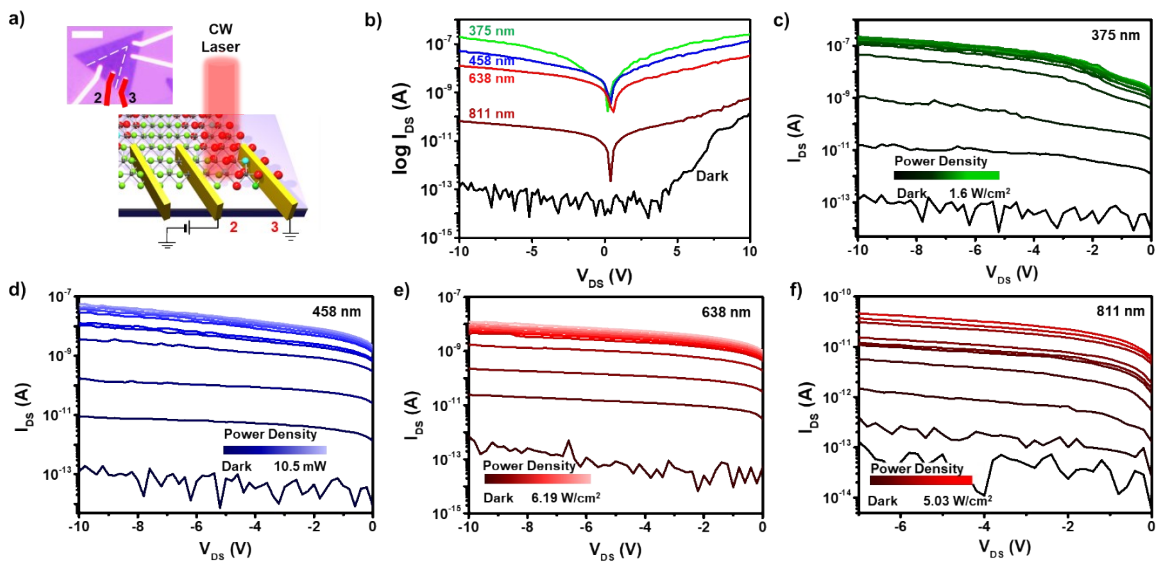

**Figure S9.** Photocurrent under different laser powers with various wavelengths such as a) 375 nm, b) 458 nm, c) 638 nm, d) 811 nm. The scale bar in the inset image of a) is  $5\mu\text{m}$

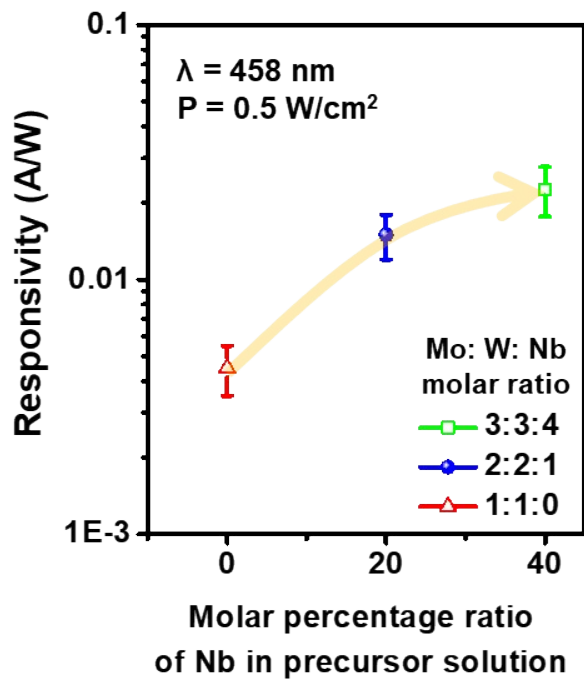

**Figure S10.** The photoresponsivity and Nb dopant dependence in  $\text{WSe}_2\text{-MoSe}_2$  lateral heterostructure.

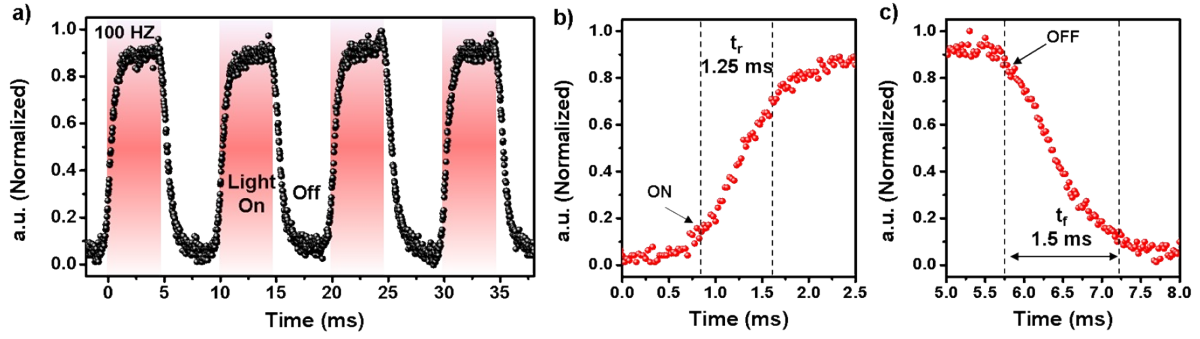

**Figure S11.** a) Photocurrent response, the laser light is turned on/off by a mechanical chopper worked at 100 Hz under illuminating 375 nm laser. b–c) The graph magnifies the rising and falling portion of the photocurrent. Rise and fall times are on the millisecond time scale.

**Table S1.** Performance comparison tables with other 2D photodetectors

| Device structure | Material                                   | Synthetic method | Measure Condition                                          | $I_{\text{Light}}/I_{\text{Dark}} \text{ Max}$ | $R \text{ [A} \cdot \text{W}^{-1}] \text{ Max}$ | $D^* \text{ [Jones] Max}$ | $t_r, t_f \text{ [ms]}$ | ref |
|------------------|--------------------------------------------|------------------|------------------------------------------------------------|------------------------------------------------|-------------------------------------------------|---------------------------|-------------------------|-----|
|                  |                                            |                  | 357 ~ 811 nm<br>$V_d = 0 \text{ V}$<br>$V_g = 0 \text{ V}$ | $>10^5$                                        | 0.33                                            | $5.78 \times 10^{15}$     | 1.25, 1.5               | Our |
|                  | $\text{WSe}_2\text{-MoSe}_2$               | CVD              | 543 nm<br>$V_d = 0$                                        | $10^2$                                         | -                                               | -                         | 6                       | [4] |
|                  | $\text{MoS}_2\text{-WS}_2$                 | CVD              | 532 nm<br>$V_d = 0 \text{ V}$<br>$V_g = 0 \text{ V}$       | $10^3$                                         | $4.36 \times 10^{-3}$                           | $4.36 \times 10^{13}$     | 4                       | [5] |
| Lateral p-n      | $\text{WS}_2\text{-WSe}_2$                 | CVD              | 514 nm<br>$V_d = 0 \text{ V}$<br>$V_g = 0 \text{ V}$       | $< 10^1$                                       | $44 \times 10^{-3}$                             | -                         | 0.1                     | [6] |
|                  | Bilayer (2L)<br>$\text{MoS}_2\text{-WS}_2$ | CVD              | 457 ~ 671 nm<br>$V_d = 5 \text{ V}$<br>$V_g = 0 \text{ V}$ | $10^3$                                         | $6.72 \times 10^3$                              | $3.09 \times 10^{13}$     | 39, 47                  | [7] |
|                  | 1L-2L $\text{Wse}_2$                       | CVD              | 532 nm<br>$V_d = 2 \text{ V}$<br>$V_g = -80 \text{ V}$     | $10^1$                                         | 109.75                                          | $5.4 \times 10^{11}$      | 290, 250                | [8] |
|                  | Partially                                  | Exfoliation      | 1550 nm<br>$V_d = 5 \text{ V}$                             | $< 10^1$                                       | $6.2 \times 10^{-3}$                            | $1.04 \times 10^{11}$     | 3, 10                   | [9] |



|              |                                              |             |                                       |          |                     |                    |              |      |
|--------------|----------------------------------------------|-------------|---------------------------------------|----------|---------------------|--------------------|--------------|------|
|              | Doped-Bp                                     |             | $V_g = -10$ V                         |          |                     |                    |              |      |
|              | Partially Doped-WSe <sub>2</sub>             | Exfoliation | 365~740 nm                            | $10^2$   | $30 \times 10^{-3}$ | $6.18 \times 10^8$ |              | [10] |
|              | Partially Doped-WSe <sub>2</sub>             | Exfoliation | 500 nm<br>$V_d = 1$ V<br>$V_g = 0$ V  | $< 10^1$ | 5.07                | $3 \times 10^{10}$ | 100,<br>-200 | [11] |
|              | MoS <sub>2</sub> -WS <sub>2</sub>            | CVD         | 514 nm                                | -        | -                   | -                  | -            | [12] |
|              | Multilayer MoS <sub>2</sub> -WS <sub>2</sub> | Exfoliation | 633 nm                                | $10^2$   | 0.76                |                    |              | [13] |
|              | WSe <sub>2</sub> -MoSe <sub>2</sub>          | CVD         | $V_d = 0.1$ V<br>$V_g = 0$ V          | $10^1$   | -                   | -                  | -            | [14] |
|              | MoS <sub>2</sub> -WSe <sub>2</sub>           | CVD         | 532 nm<br>$V_d = 0$ V<br>$V_g = 0$ V  | -        | 0.002               | -                  | 0.1          | [15] |
| Vertical p-n | 2L-2L MoS <sub>2</sub> -WSe <sub>2</sub>     | CVD         | 532 nm<br>$V_d = 0$ V<br>$V_g = 0$ V  | -        | -                   | -                  | -            | [16] |
|              | ML-ML MoS <sub>2</sub> -WS <sub>2</sub>      | Exfoliation | 633 nm                                | $10^1$   | 1.42                | -                  | -            | [13] |
|              | MoSe <sub>2</sub>                            | CVD         | 650 nm                                | $10^2$   | -                   | -                  | -            | [17] |
| Single TMD   | MoSe <sub>2</sub>                            | CVD         | 532 nm<br>$V_d = 10$ V<br>$V_g = 0$ V | $10^2$   | 0.013               | -                  | 60           | [18] |

**Table S2. Performance comparison tables with other 2D photodetectors**

| Device structure | Material                                             | Thickness | Rectification Ratio | $V_{oc}$ | ref  |
|------------------|------------------------------------------------------|-----------|---------------------|----------|------|
|                  | Nb-doped WSe <sub>2</sub> -MoSe <sub>2</sub>         | 1L        | 10000               | 0.52 V   | our  |
|                  | WS <sub>2</sub> -MoS <sub>2</sub>                    | 1L        | 100                 | 0.12 V   | [6]  |
| Lateral p-n      | WSe <sub>2</sub> -WS <sub>2</sub>                    | ML        | -                   | 0.47 V   | [6]  |
|                  | In <sub>2</sub> Se <sub>3</sub> -CuInSe <sub>2</sub> | 14        | 10                  | 0.03 V   | [9]  |
|                  | WS <sub>2</sub> -MoS <sub>2</sub>                    | 2L        | 1000                | -        | [7]  |
|                  | WSe <sub>2</sub> -MoS <sub>2</sub>                   | 1L        | 10                  | 0.22 V   | [20] |

## References

- 1 Q. Feng, M. Zhu, Y. Zhao, H. Liu, M. Li, J. Zheng, H. Xu and Y. Jiang, *Nanotechnology*, 2018, **30**, 34001.
- 2 S. Boandoh, S. H. Choi, J. H. Park, S. Y. Park, S. Bang, M. S. Jeong, J. S. Lee, H. J. Kim, W. Yang, J. Y. Choi, S. M. Kim and K. K. Kim, *Small*, 2017, **13**, 1–9.
- 3 H. Kim, G. H. Han, S. J. Yun, J. Zhao, D. H. Keum, H. Y. Jeong, T. H. Ly, Y. Jin, J. H. Park, B. H. Moon, S. W. Kim and Y. H. Lee, *Nanotechnology*, , DOI:10.1088/1361-6528/aa7e5e.
- 4 S. Jia, Z. Jin, J. Zhang, J. Yuan, W. Chen, W. Feng, P. Hu, P. M. Ajayan and J. Lou, *Small*, 2020, **2002263**, 1–7.
- 5 W. Wu, Q. Zhang, X. Zhou, L. Li, J. Su, F. Wang and T. Zhai, *Nano Energy*, 2018, **51**, 45–53.
- 6 X. Duan, C. Wang, J. C. Shaw, R. Cheng, Y. Chen, H. Li, X. Wu, Y. Tang, Q. Zhang, A. Pan, J. Jiang, R. Yu, Y. Huang and X. Duan, *Nat. Nanotechnol.*, 2014, **9**, 1024–1030.
- 7 K. Ye, L. Liu, Y. Liu, A. Nie, K. Zhai, J. Xiang, B. Wang, F. Wen, C. Mu, Z. Zhao, Y. Gong, Z. Liu and Y. Tian, *Adv. Opt. Mater.*, 2019, **7**, 1–7.
- 8 R. Cheng, D. Li, H. Zhou, C. Wang, A. Yin, S. Jiang, Y. Liu, Y. Chen, Y. Huang and X. Duan, *Nano Lett.*, 2014, **14**, 5590–5597.
- 9 Y. Liu, Y. Cai, G. Zhang, Y. W. Zhang and K. W. Ang, *Adv. Funct. Mater.*, 2017, **27**, 1–9.

- 10 M. Sun, D. Xie, Y. Sun, W. Li, T. Ren, *Nanotechnology* **2018**, *29*, 015203.
- 11 Z. Q. Xu, Y. Zhang, Z. Wang, Y. Shen, W. Huang, X. Xia, W. Yu, Y. Xue, L. Sun, C. Zheng, Y. Lu, L. Liao, Q. Bao, *2D Mater.* **2016**, *3*, 041001.
- 12 K. Chen, X. Wan, J. Wen, W. Xie, Z. Kang, X. Zeng, H. Chen, J. Bin Xu, *ACS Nano* **2015**, *9*, 9868.
- 13 N. Huo, J. Kang, Z. Wei, S. S. Li, J. Li, S. H. Wei, *Adv. Funct. Mater.* **2014**, *24*, 7025.
- 14 Y. Gong, S. Lei, G. Ye, B. Li, Y. He, K. Keyshar, X. Zhang, Q. Wang, J. Lou, Z. Liu, R. Vajtai, W. Zhou and P. M. Ajayan, *Nano Lett.*, 2015, **15**, 6135–6141.
- 15 C. H. Lee, G. H. Lee, A. M. Van Der Zande, W. Chen, Y. Li, M. Han, X. Cui, G. Arefe, C. Nuckolls, T. F. Heinz, J. Guo, J. Hone and P. Kim, *Nat. Nanotechnol.*, 2014, **9**, 676–681.
- 16 Y. Gong, J. Lin, X. Wang, G. Shi, S. Lei, Z. Lin, X. Zou, G. Ye, R. Vajtai, B. I. Yakobson, H. Terrones, M. Terrones, B. K. Tay, J. Lou, S. T. Pantelides, Z. Liu, W. Zhou, P. M. Ajayan, *Nat. Mater.* **2014**, *13*, 1135.
- 17 Y.-H. Chang, W. Zhang, Y. Zhu, Y. Han, J. Pu, J.-K. Chang, W.-T. Hsu, J.-K. Huang, C.-L. Hsu, M.-H. Chiu, T. Takenobu, H. Li, C.-I. Wu, W.-H. Chang, L.-J. L. Andrew Thye Shen Wee, *ACS Nano* **2019**, *8*, 8582.
- 18 J. Xia, X. Huang, L. Z. Liu, M. Wang, L. Wang, B. Huang, D. D. Zhu, J. J. Li, C. Z. Gu, X. M. Meng, *Nanoscale* **2014**, *6*, 8949.
- 19 Z. Zheng, J. Yao, G. Yang, *ACS Appl. Mater. Interfaces* **2017**, *9*, 7288.

20 M. Y. Li, Y. Shi, C. C. Cheng, L. S. Lu, Y. C. Lin, H. L. Tang, M. L. Tsai, C. W. Chu, K. H. Wei, J. H. He, W. H. Chang, K. Suenaga, L. J. Li, *Science* (80-. ). **2015**, 349, 524.
